CORRECTION

# Correction: Hepatitis C Virus Nonstructural Protein 5A Inhibits MG132-Induced Apoptosis of Hepatocytes in Line with NF- $\kappa$ B-Nuclear Translocation

The *PLOS ONE* Staff

There is an error in the first sentence of the third paragraph in the Discussion. The correct sentence is: NF- $\kappa$ B activation was blocked by either adenovirus-mediated overexpression of I $\kappa$ B $\alpha$  suppressor or pretreatment with MG132 in lung cancer cells [40]. The publisher apologizes for this error.

## Reference

1. Jiang X, Kanda T, Wu S, Nakamoto S, Nakamura M, Sasaki R, et al. (2015) Hepatitis C Virus Nonstructural Protein 5A Inhibits MG132-Induced Apoptosis of Hepatocytes in Line with NF- $\kappa$ B-Nuclear Translocation. PLoS ONE 10(7): e0131973. doi: [10.1371/journal.pone.0131973](https://doi.org/10.1371/journal.pone.0131973) PMID: [26133378](https://pubmed.ncbi.nlm.nih.gov/26133378/)

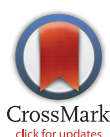

## OPEN ACCESS

**Citation:** The *PLOS ONE* Staff (2015) Correction: Hepatitis C Virus Nonstructural Protein 5A Inhibits MG132-Induced Apoptosis of Hepatocytes in Line with NF- $\kappa$ B-Nuclear Translocation. PLoS ONE 10(7): e0134068. doi:[10.1371/journal.pone.0134068](https://doi.org/10.1371/journal.pone.0134068)

**Published:** July 21, 2015

**Copyright:** © 2015 The PLOS ONE Staff. This is an open access article distributed under the terms of the [Creative Commons Attribution License](https://creativecommons.org/licenses/by/4.0/), which permits unrestricted use, distribution, and reproduction in any medium, provided the original author and source are credited.
